# Supplementary material
Source: PubMed Central journal article supplement (PMC2818195)

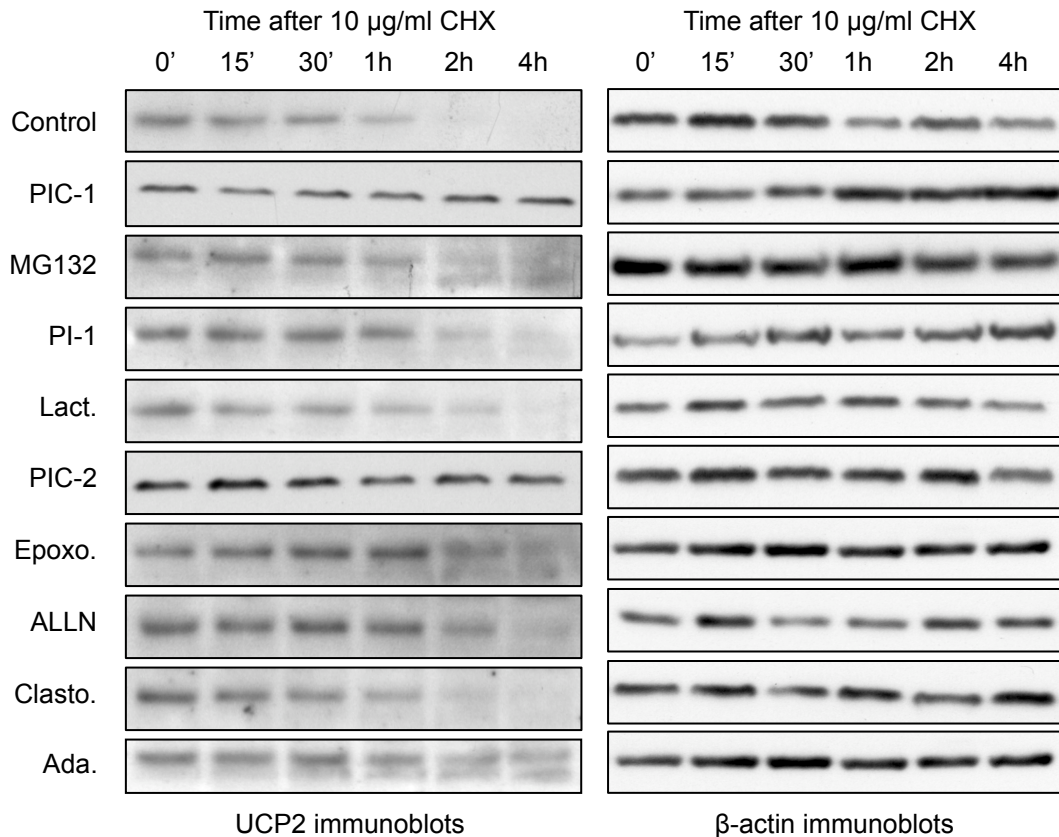

Supplement: supp_123_4_578__1.pdf [file supp_123_4_578__1.pdf]

Time after 10  $\mu$ g/ml CHX

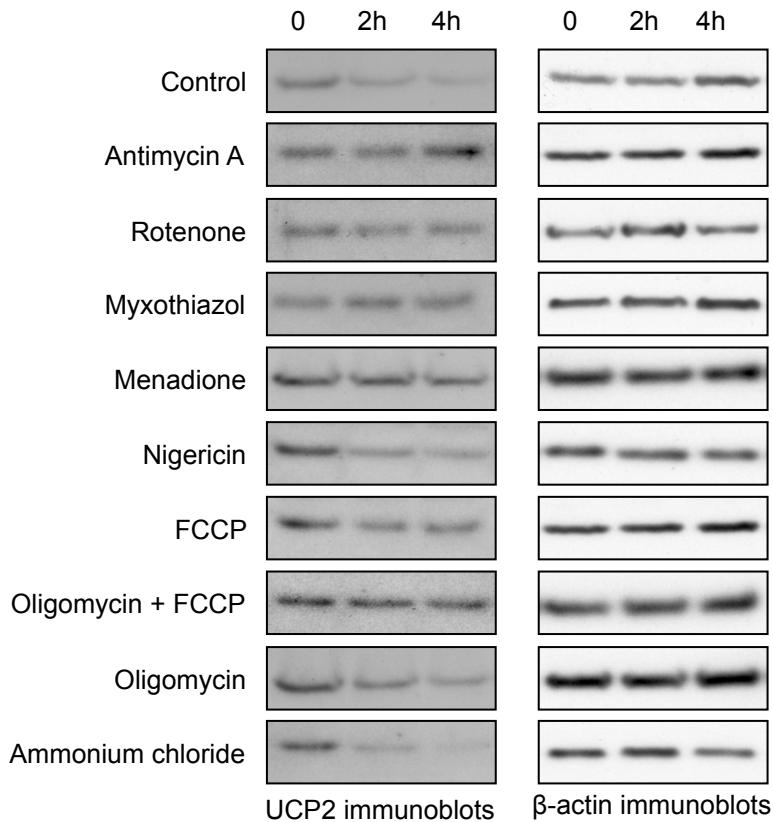

Supplement: supp_123_4_578__2.pdf [file supp_123_4_578__2.pdf]

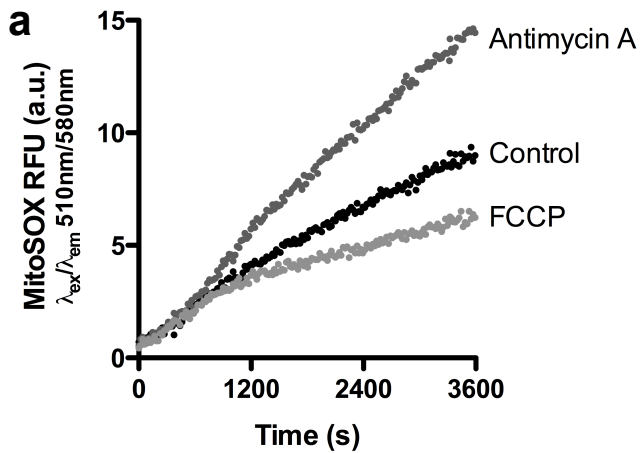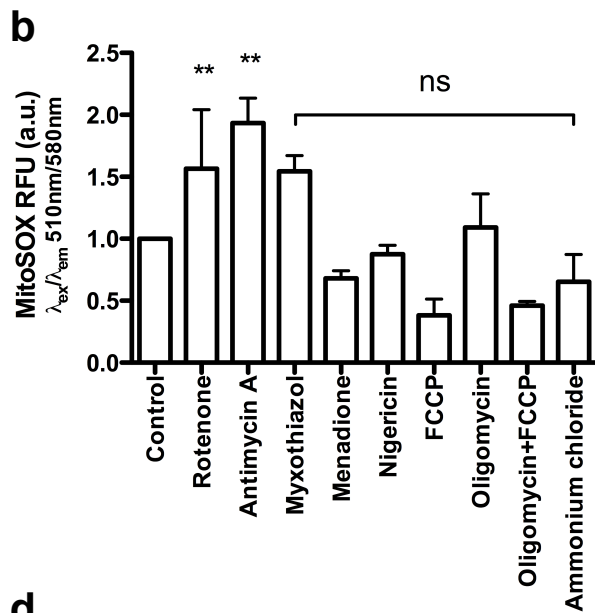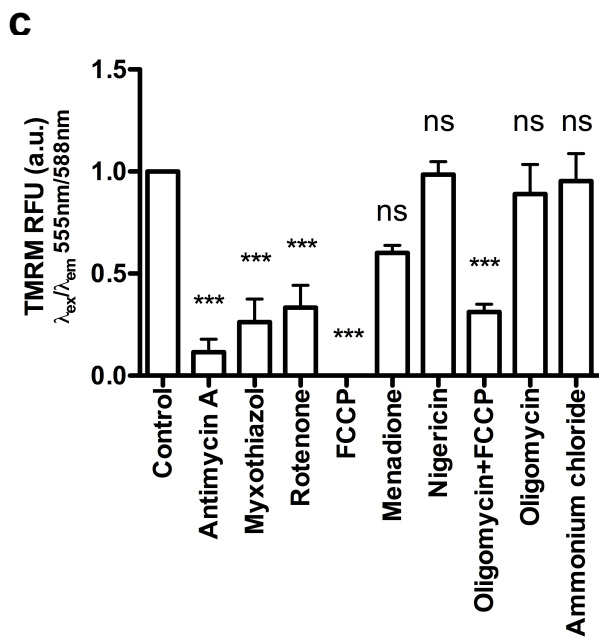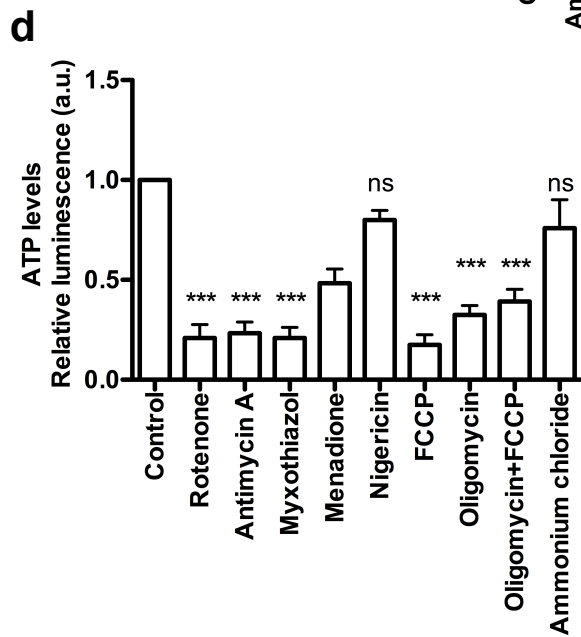

Supplement: supp_123_4_578__3.pdf [file supp_123_4_578__3.pdf]

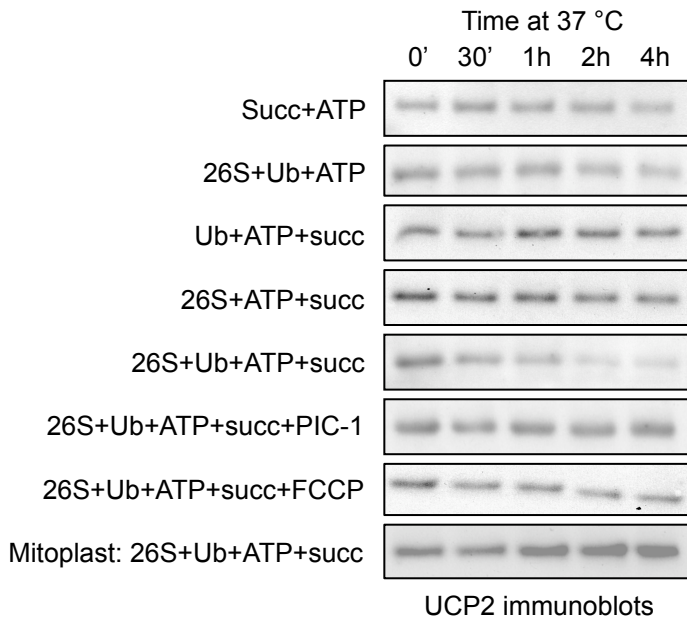

Supplement: supp_123_4_578__4.pdf [file supp_123_4_578__4.pdf]
